# Supplementary material
Source: MDPI journal article supplement (https://www.mdpi.com/2076-3417/11/10/4630)
Supplement: s1 [file s1]

XLS files refer to the tilt variations measured from December 2 to 7 at the eight stations here considered.

In other three XLS files, the tilt measured for the first three paroxysms are summarized. Each file lists the station name, its coordinates, and its tilt components (in microradians).

The last XLS file contains the covariant matrix for the GPS baselines.

The baseline variations are stored in a data structure within the MAT file. The structure includes the station names and locations, and a table with the baseline variations estimated for each period of the piecewise linear regression.

3D\_SISTEM\_output.zip: zipfile containing Ue\_SISTEM.asc, Un\_SISTEM.asc, Uu\_SISTEM.asc SISTEM 3D Output (East, North and Up components of GPS and DInSAR integrated deformation, respectively) in ESRI- ASCII grid format, Word Geodetic System 1984 UTM, zone 33N (IGNF:UTM33W84), reference system (m) and a README.TXT file describing these files.

SARvsSISTEM - In the figure the Real LOS, the SISTEM Predicted LOS, and the Residual between the Real and Predicted LOS are reported respectively. The reported units are millimeters.

GPSvsSISTEM – The plots show the values of the observed GPS east, north, and vertical components of displacements (in blue), compared to the same components obtained by SISTEM approach for each GPS station (in orange). On the observed GPS data we added an error bar of 4 mm for the Horizontal components, and an error bar of 9 mm for the vertical one.
